# Supplementary material for: An HPLC-DAD method for rapid and high resolution analysis of concentrated BTEX and styrene aqueous samples
Source: Royal Society of Chemistry journal article supplement (doi:10.1039/c2ay25947h), 2012-01-01
Supplement: c2ay25947h.pdf [file c2ay25947h.pdf]

## 1 Supplementary figures

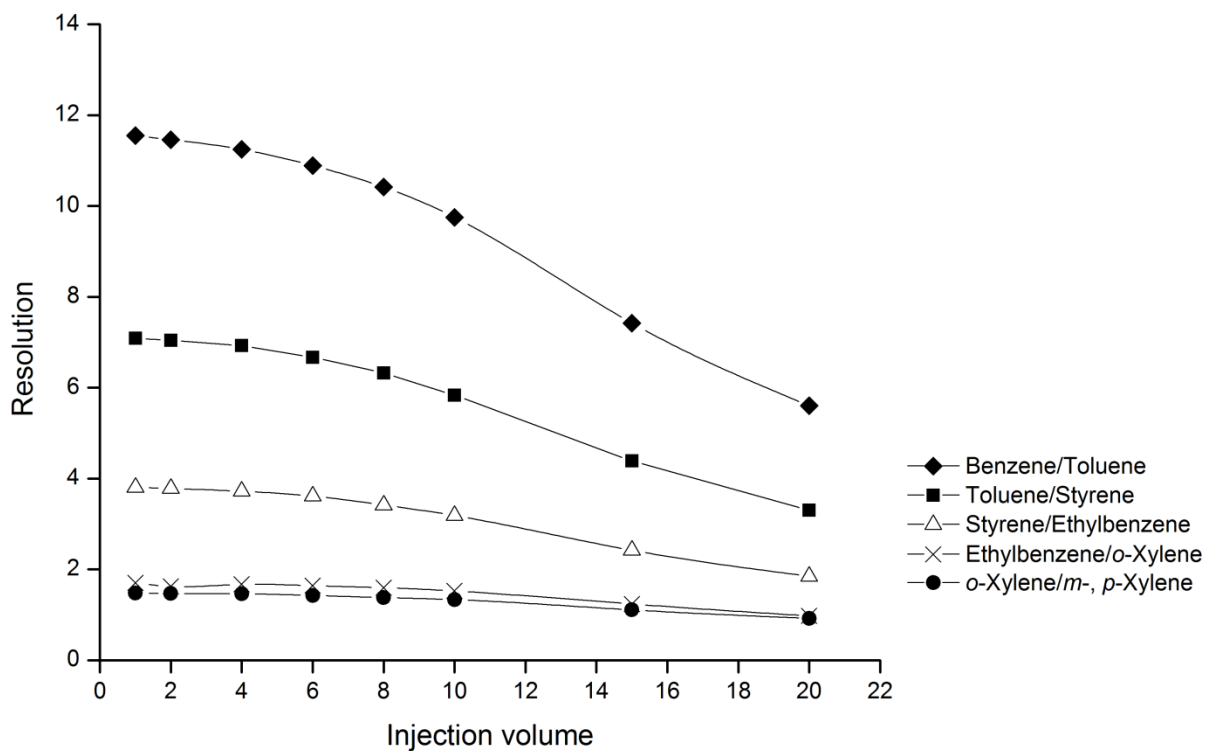

2

3 Fig. S1. Effect of injection volume on the resolution of a standard 2.0 mM equimolar mixture of  
4 BTEXS. Separation was conducted with 60% methanol mobile phase at a flow rate of 1.2  
5 mL/min. Results are the average of three independent experiments with standard deviations  
6 within  $\pm 0.12$ .

7

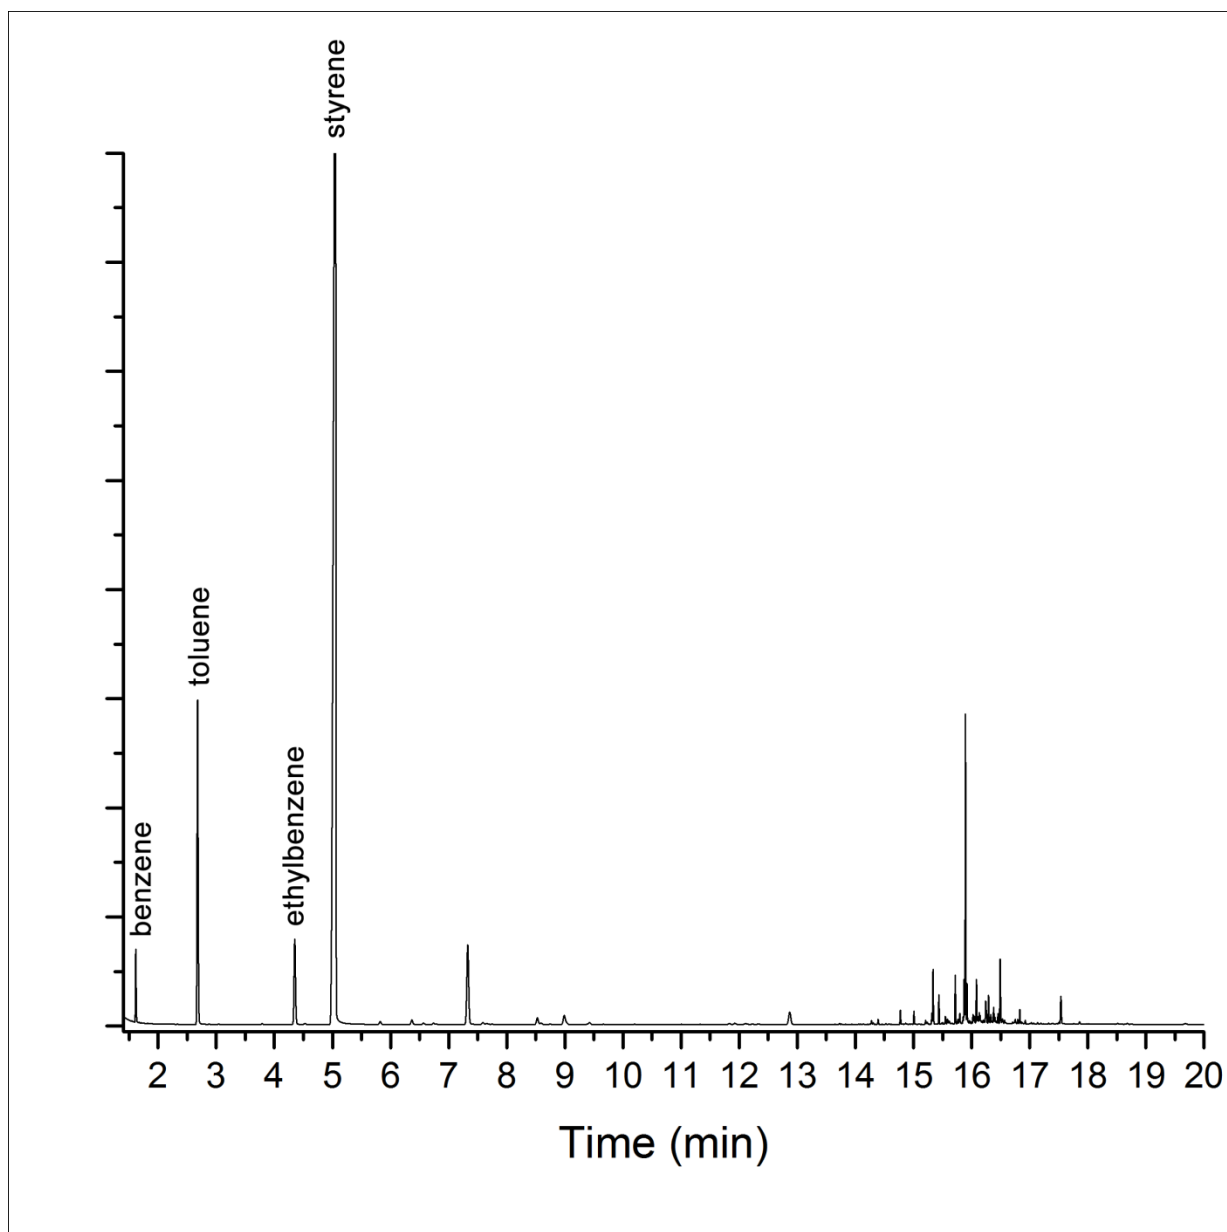

8

9 Fig. S2. GC-FID analysis of a real wastewater sample contaminated by petroleum aromatic  
10 products from a plastic pyrolysis facility. The elution times of benzene, toluene, ethylbenzene  
11 and styrene were 1.6, 2.6, 4.3 and 5.0 min respectively.
